# Supplementary material for: Ultrasensitive fluorescent aptasensor for MUC1 detection based on deoxyribonuclease I-aided target recycling signal amplification
Source: Royal Society of Chemistry journal article supplement (doi:10.1039/c8ra06498a), 2018-01-01
Supplement: c8ra06498a1.pdf [file c8ra06498a1.pdf]

### Optimization of Aptamer

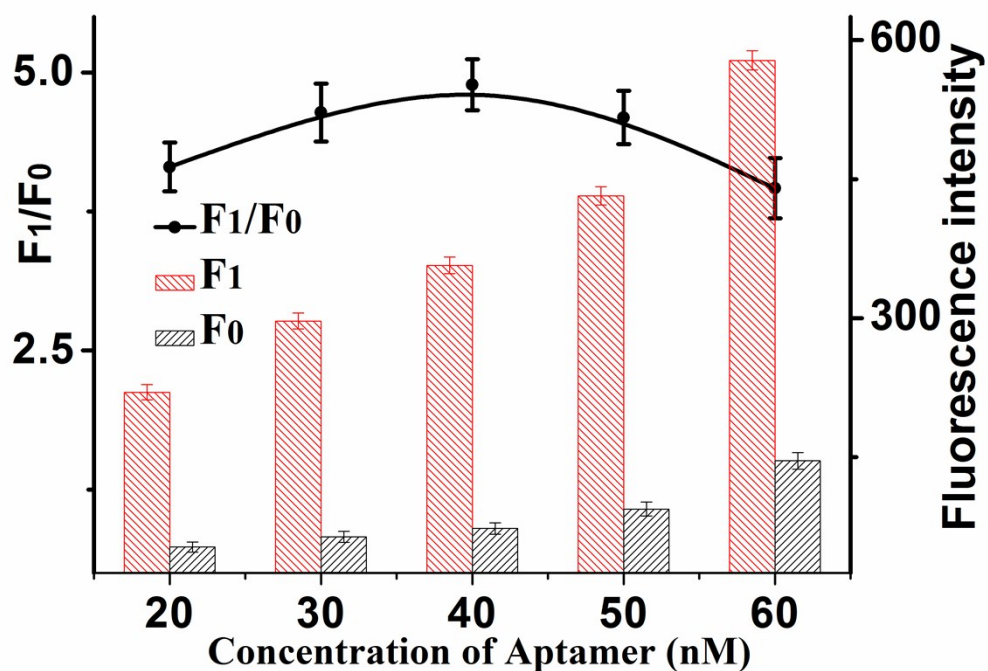

**Fig.S1.** The effect of Aptamer on the fluorescence intensity at the emission wavelength of 519 nm. The concentrations of Dnase I, MUC1 and GO were  $2 \text{ U} \cdot \text{mL}^{-1}$ ,  $5 \text{ ng} \cdot \text{mL}^{-1}$  and  $15 \text{ } \mu\text{g} \cdot \text{mL}^{-1}$ , respectively. Error bars: SD,  $n=3$ .
